# Supplementary material for: The S100A4 Protein Signals through the ErbB4 Receptor to Promote Neuronal Survival
Source: PubMed Central journal article supplement (PMC6071530; doi:10.7150/thno.22274), 2018-07-01
Supplement: thnov08p3977s1.pdf [file thnov08p3977s1.pdf]

## SUPPLEMENTARY FIGURE LEGENDS

**Suppl. Fig. 1.** (A) SPR binding of S100A4 to immobilized ErbB1, 3 and 4. (B) SPR binding of ErbB4 inhibitory antibodies, 20 and 40  $\mu\text{g/ml}$  (Ab 20 and 40) to the immobilized S100A4, representative of three independent experiments. RAGE (500 nM), a known binding partner of S100A4, was used as a positive control.

**Suppl. Fig. 2.** Sequences of primers (A) and S100A4-derived peptides (B) used in the study.

# Suppl Fig. 1

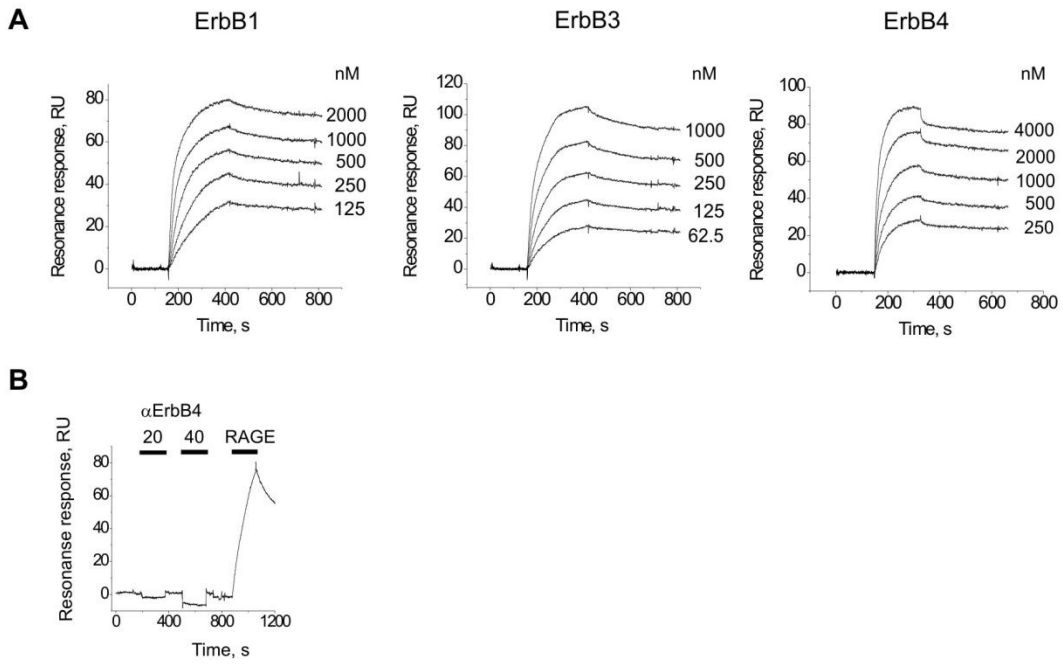

# Suppl Fig. 2

**A**

**S100A4-derived peptides**  
**H3:** KELLTRELPSFLGKRT  
**H6:** NEFFEGFPDKQPRKK

**B**

Sequences of primers used in the study

| Gene          | Forward Primer Sequence [5'3'] | Forward Primer Sequence [5'-3'] | Amplicon length (bp) |
|---------------|--------------------------------|---------------------------------|----------------------|
| <b>S100A4</b> | <b>GGCAAGACCCTTGGAGGAGGC</b>   | <b>GCTGTCCAAGTTGCTCAT</b>       | <b>193</b>           |
| <b>ErbB3</b>  | <b>TAGGTGCCAAAGGTCCAATC</b>    | <b>TTGCTCATCAACACCTCTGC</b>     | <b>136</b>           |
| <b>ErbB4</b>  | <b>GAACAATGTGATGGCAGGTG</b>    | <b>TGAAGTTCATGCAGGCAAAG</b>     | <b>115</b>           |
| <b>GAPDH</b>  | <b>AAGGTCATCCCAGAGCTGAACG</b>  | <b>CCTGCTTCACCACCTTCTTGAT</b>   | <b>139</b>           |
